# Supplementary material for: An Arctic Ozone Hole in 2020 If Not For the Montreal Protocol
Source: Copernicus journal article supplement (doi:10.5194/acp-2020-1297), 2021-01-08
Supplement: Supplementary file 1 [file acp-2020-1297-supplement.pdf]

## Supplementary Information for:

# An Arctic Ozone Hole in 2020 If Not For the Montreal Protocol

Catherine Wilka<sup>1</sup>, Susan Solomon<sup>1</sup>, Doug Kinnison<sup>2</sup>, David Tarasick<sup>3</sup>

5 <sup>1</sup>Department of Earth, Atmospheric and Planetary Sciences, Massachusetts Institute of Technology, Cambridge, MA, USA

<sup>2</sup>Atmospheric Chemistry Division, National Center for Atmospheric Research, Boulder, CO, USA

<sup>3</sup>Environment and Climate Change Canada, Toronto, ON, Canada

*Correspondence to:* Catherine Wilka (cwilka@mit.edu)

### 10 **This Supplement Includes:**

Figures S1 to S6

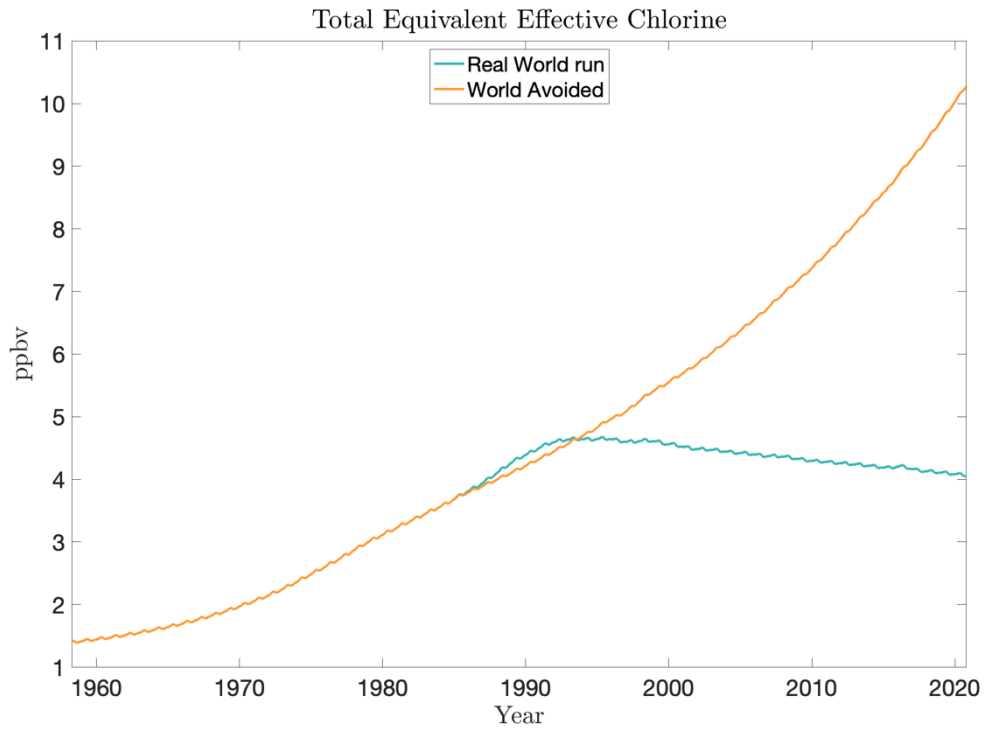

15

**Figure S1.** Evolution of Total Equivalent Effective Chlorine in ppbv, globally averaged, in the Real World run and the World Avoided. The two diverge beginning in 1985.

SD-WACCM Total Column O<sub>3</sub>, World Avoided, 17-Mar-2011

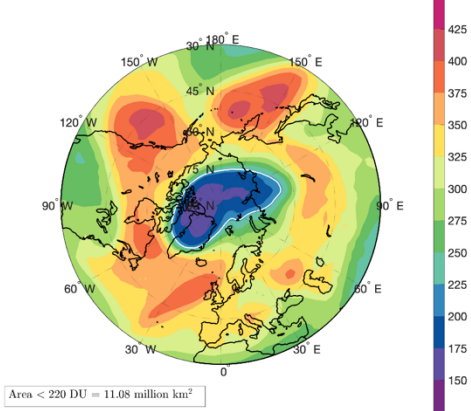

SD-WACCM Total Column O<sub>3</sub>, Real World, 17-Mar-2011

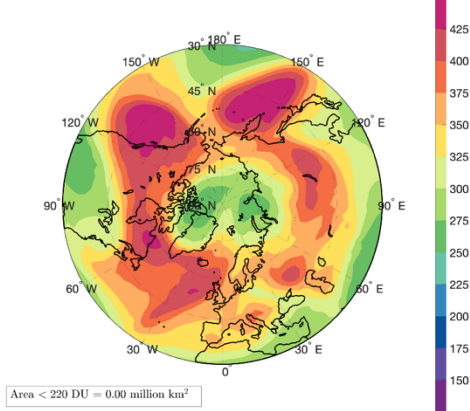

SD-WACCM Total Column O<sub>3</sub>, WA - RW, 17-Mar-2011

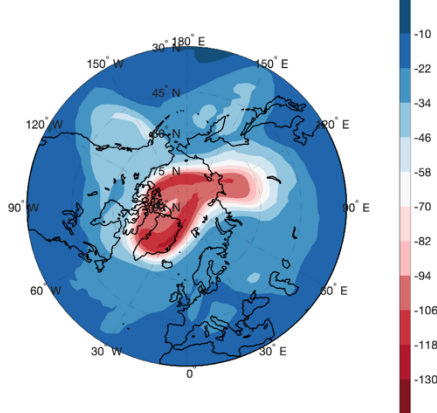

OMI Total Column O<sub>3</sub>, 17-March-2011

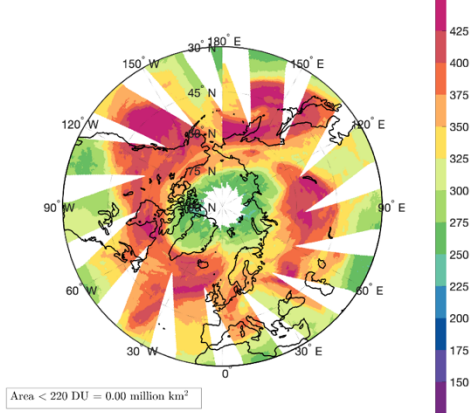

Figure S2. As for Figure 1, but for 2011.

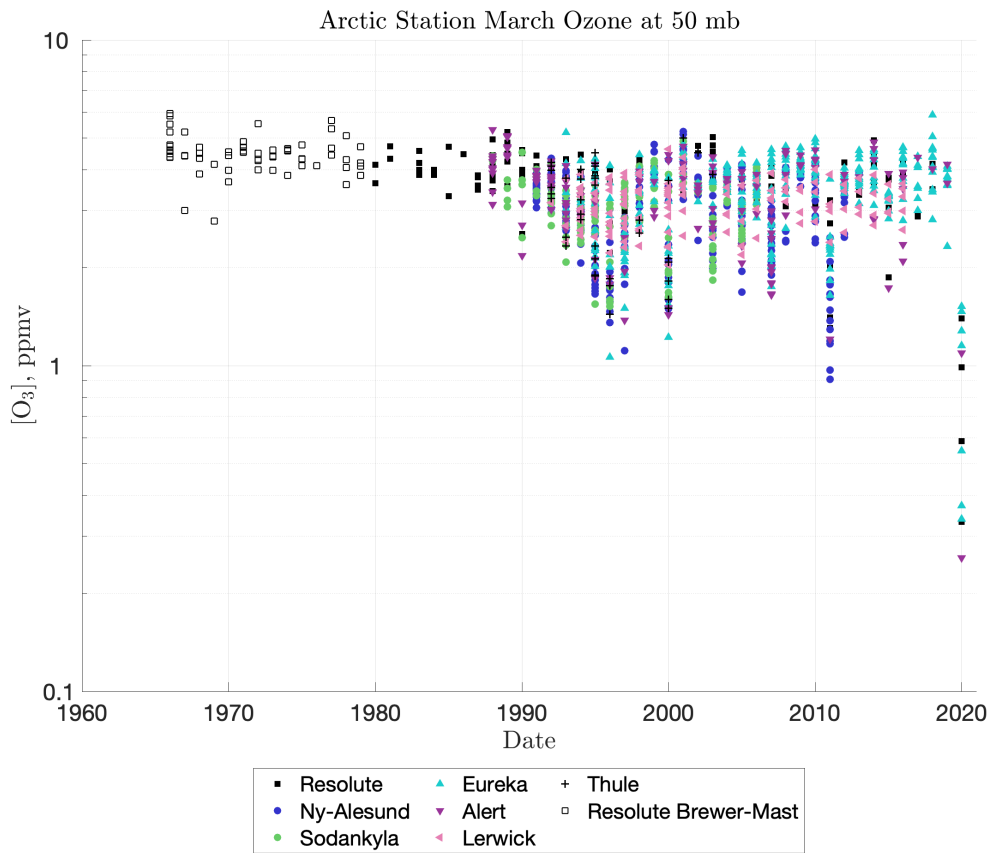

25 **Figure S3.** As for the left panel of Figure 2, but in log-scale.

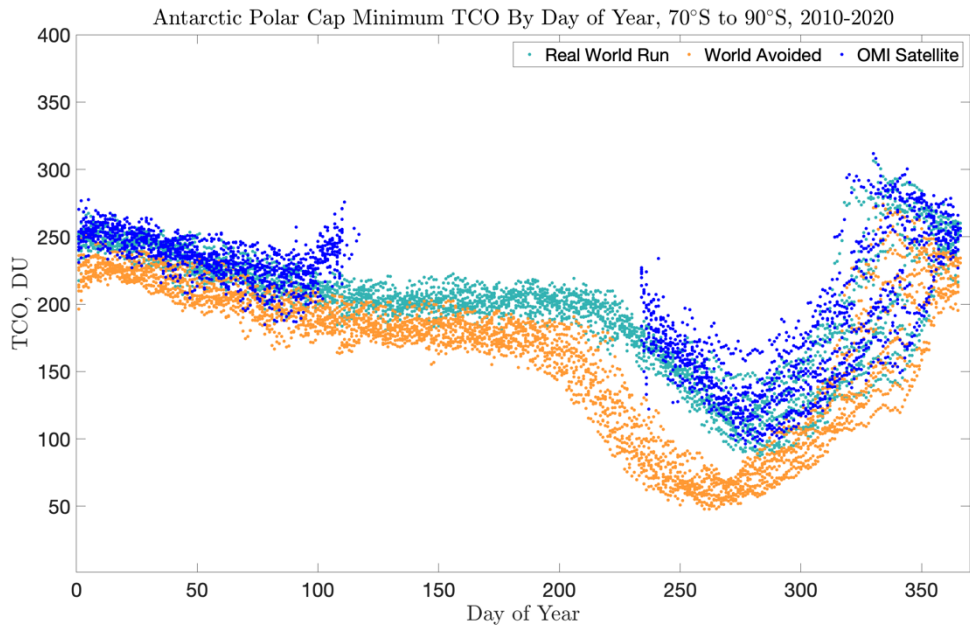

30 **Figure S4.** As for Figure 4, but for the Antarctic.

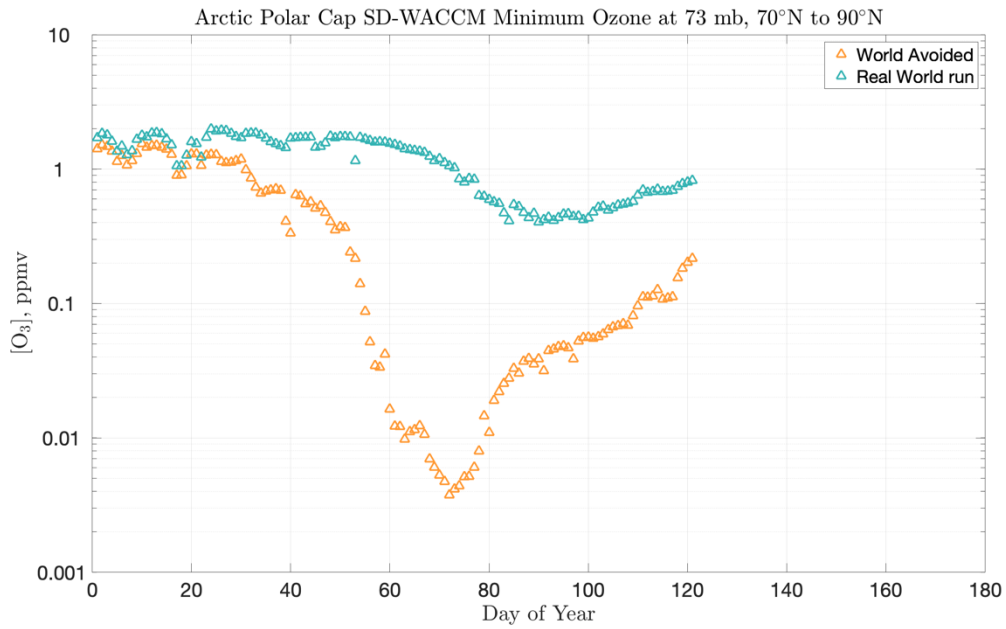

35 **Figure S5.** Minimum ozone across the polar cap ( $70^\circ$  N- $90^\circ$  N, all longitudes) for each day in 2020 for Real World (teal) and World Avoided (orange) runs in SD-WACCM at 73 mb.

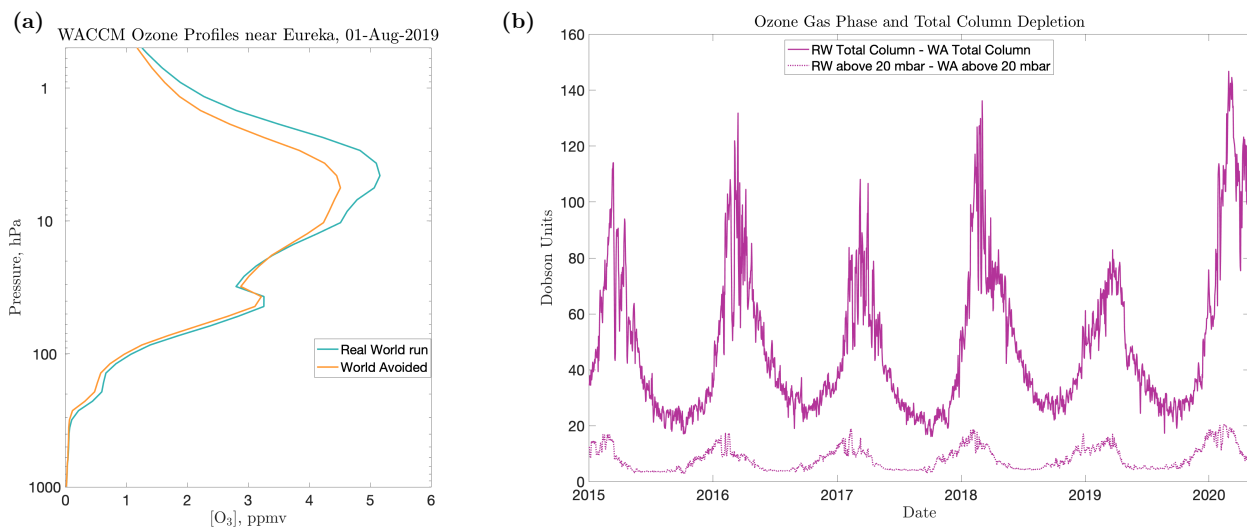

40 **Figure S6. (a)** Comparison between the Real World and World Avoided profiles in SD-WACCM at the model gridpoint nearest to Eureka station for August 1<sup>st</sup>, 2019. Note the y-axis goes to lower pressures than the profiles in Figures 2 and 5. **(b)** Comparison between the total column ozone depletion and the partial column ozone depletion at altitudes above 20 mb in the Real World vs World Avoided runs.
